# Supplementary material
Source: PubMed Central journal article supplement (PMC5510603)
Supplement: NIHMS876492-supplement-10549_2017_4287_MOESM1_ESM.pdf [file NIHMS876492-supplement-10549_2017_4287_MOESM1_ESM.pdf]

## Study population details

Six of the study sites (Australia, Ontario, Philadelphia, Northern California, and New York) are members of the Breast Cancer Family Registry (BCFR), whose recruiting methods are described elsewhere.<sup>1</sup> Briefly, two of the BCFR centers (Northern California and Canada) recruited index cases through population-based registries, three (Utah, Philadelphia, and New York) recruited through clinic- and community-based outreach, and one (Australia) recruited through a mix of population- and clinic-based outreach. Participants were also included from four studies not included in the BCFR consortium. Three of these, the German Genetic Epidemiologic Study of Breast Cancer;<sup>2</sup> and Long Island Breast Cancer Study Project;<sup>3</sup> and the Seattle Study,<sup>4</sup> are population-based case-control studies whose recruiting methods are described elsewhere. The Chicago participants were enrolled from the Chicago Multi-ethnic Breast Cancer Epidemiologic Cohort, a hospital-based study of breast cancer at the University of Chicago.<sup>5;6</sup> The Chicago participants were identified through a clinic-based recruitment. Their demographic, clinical, and pathological data were gathered from medical chart review and cancer registry records, epidemiologic risk factors were collected via structured questionnaire, and mortality outcomes were ascertained via medical records and linkages with the national death index and cancer registry records. A schematic of the variants used in the primary analysis is shown in Supplemental Figure 1.

## Exome-wide genotyping

Two versions of the exome array were used: The Illumina HumanExome 12v1.0 chip was used on 2527 cases, and the Illumina HumanExome 12v1.1 chip was used on 480 cases. The samples were processed using 49 plates in two batches, and the process was carried out according to the manufacturer's protocol. To improve the quantity and quality of available genomic DNA, the samples were whole genome amplified using the Qiagen Repli-G mini kit,<sup>7</sup> and were processed using 49 plates in two batches, following the manufacturer's protocol. TeCan Evo was used for automation. Raw data was processed by Genome Studio on 2010.3 software, and the no-call threshold was set at 0.15, per Illumina's recommendation for Infinium chips. Clustering was done using the Illumina supplied cluster files. After keeping only variants that were on both chips, 238,524 variants were interrogated. The quality control followed the protocol outline by Guo et al.<sup>8</sup> Participants were excluded for low genotyping rate (rate < 95%; 219 excluded), high heterozygosity (F statistic greater than three standard deviations from the mean, or heterozygosity greater than four standard deviations from the mean; 31 excluded), and one of each pair of duplicated genotypes (eight samples excluded: three replicates; five duplicates from the same center). Additionally, due to the family-

based case ascertainment of some of the studies, seven participants were excluded whose genotypes were highly correlated (estimated relatedness from a GCTA-created genetic relatedness matrix greater than 0.4).<sup>9</sup> Variants were excluded from the analysis if they had a low call rate (rate < 95%; 4335 excluded), or if they were common variants (defined below) with Hardy-Weinberg equilibrium p-values of less than  $2.5 \cdot 10^{-7}$  in controls (p = 0.05 Bonferroni corrected for 200,000 tests; 39 excluded). The final variant-level exclusions were the result of evidence that on some plates variants were unreliably assigned (a plate-by-plate single marker regression analysis found that in some cases genotype could predict plate). For these variant-plate combinations, variants were excluded for all participants on that plate if this GWAS p-value was smaller than  $2.5 \cdot 10^{-7}$ . As a result of this quality control step, 100 variant-plate combinations were set to missing.

## Principal component estimation

EIGENSTRAT<sup>10</sup> constructed two sets of principal components from the exome variants. One set was constructed using common variants assayed by the array ( $MAF > 0.0130$ ) ( $PC_c$ ), and one was constructed using rare variants ( $PC_r$ ). To determine which of these principal components had a high chance of confounding the relationship, a series of non-genetic Cox regressions was run that included each additional PC in a step-wise fashion in order of their univariate significance. Likelihood ratio tests determined that the first three  $PC_c$  and the second  $PC_r$  were associated with the hazard of mortality, and including additional principal components did not improve the model fit. These four principal components were included in all subsequent mortality analyses. Similar analyses were done to determine the optimal number of  $PC_c$  and  $PC_r$  to include in each of the five tumor characteristic logistic analyses (ER status analysis included  $PC_{c,1}$ ,  $PC_{c,2}$ ,  $PC_{c,3}$ , and  $PC_{r,2}$ ; PR status analysis included  $PC_{c,1}$ ,  $PC_{c,2}$ ,  $PC_{c,6}$ , and  $PC_{r,2}$ ; HER2 status included  $PC_{c,1}$ ,  $PC_{c,2}$ ,  $PC_{c,3}$ ,  $PC_{c,4}$ ,  $PC_{c,5}$ ,  $PC_{r,2}$  and  $PC_{r,4}$ ; high tumor grade analysis included  $PC_{c,1}$ ; and high tumor stage analysis included  $PC_{c,1}$ ,  $PC_{c,4}$ , and  $PC_{r,2}$ ).

## Genome-wide genotyping

Details of the BCFR genotyping are found elsewhere.<sup>11</sup> Briefly, the DNA was genotyped using the Illumina 610-Quad and Cyto12 v2 BeadChips, and standard laboratory quality control procedures were applied. After quality control, 555,254 variants and 3333 participants were brought forward to imputation, which was implemented by the Michigan imputation server,<sup>12</sup> employing ShapeIt<sup>13</sup> to pre-phase the variants and minimac3 to impute<sup>14</sup>. In order to best impute rare variants,<sup>15;16</sup> the entire 1000 Genomes phase 3 release<sup>17</sup> was used for a reference panel. Imputed variants with an imputation  $r^2$  greater than 0.8 were kept.

## TCGA genome-wide genotyping, quality control, and imputation

The germline SNV data were measured using the Affymetrix Genome-Wide Human SNP 6.0 array, and the intensities were converted to genotype calls using the Broad Birdsuite.<sup>18</sup> To be comparable with the primary analysis, the analysis was restricted to female cases of European ancestry with mortality information available, excluding any participants or samples annotated “DNU” (Do Not Use) (900,380 variants from 768 participants). These samples were then subjected to the same quality control steps outlined above, resulting in the following exclusions: two participants were excluded for high levels of missingness; thirty nine were excluded for high heterozygosity; sixteen for outlying principal components, and none were highly related or duplicates. 42,150 variants were excluded due to their low call rate, and 60 were excluded for failing Hardy-Weinberg equilibrium. After these quality control procedures, 711 cases and 858,170 variants were brought forward for imputation. Imputation was implemented by the Michigan imputation server,<sup>12</sup> employing ShapeIt<sup>13</sup> and minimac3<sup>14</sup> to impute variants that were not measured. In order to best impute rare variants,<sup>15;16</sup> the entire 1000 Genomes phase 3 release<sup>17</sup> was used for a reference panel. Variants with an imputation  $r^2$  greater than 0.3 were kept (15,121,555 variants). A schematic of the variants used in the replication analysis is in Supplemental Figure 2

## References

- [1] John EM, Hopper JL, Beck JC, Knight JA, Neuhausen SL, Senie RT, Ziogas A, Andrulis IL, Anton-Culver H, Boyd N, Buys SS, Daly MB, O'Malley FP, Santella RM, Southey MC, Venne VL, Venter DJ, West DW, Whittemore AS, Seminara D, and Breast Cancer Family Registry. The Breast Cancer Family Registry: an infrastructure for cooperative multinational, interdisciplinary and translational studies of the genetic epidemiology of breast cancer. *Breast cancer research: BCR*, 6(4):R375–389, 2004.
- [2] Chang-Claude J, Eby N, Kiechle M, Bastert G, and Becher H. Breastfeeding and breast cancer risk by age 50 among women in Germany. *Cancer causes & control: CCC*, 11(8):687–695, September 2000.
- [3] Gammon MD, Neugut AI, Santella RM, Teitelbaum SL, Britton JA, Terry MB, Eng SM, Wolff MS, Stellman SD, Kabat GC, Levin B, Bradlow HL, Hatch M, Beyea J, Camann D, Trent M, Senie RT, Garbowski GC, Maffeo C, Montalvan P, Berkowitz GS, Kemeny M, Citron M, Schnabe F, Schuss A, Hajdu S, Vinciguerra V, Collman GW, and Ostrams GI. The Long Island Breast Cancer Study Project: description of a multi-institutional collaboration to identify environmental risk factors for breast cancer. *Breast Cancer Research and Treatment*, 74(3):235–254, June 2002.
- [4] Friedrichsen DM, Malone KE, Doody DR, Daling JR, and Ostrander EA. Frequency of CHEK2 mutations in a population based, case-control study of breast cancer in young women. *Breast cancer research: BCR*, 6(6):R629–635, 2004.
- [5] Nanda R, Schumm LP, Cummings S, Fackenthal JD, Sveen L, Ademuyiwa F, Cobleigh M, Esserman L, Lindor NM, Neuhausen SL, and Olopade OI. Genetic testing in an ethnically diverse cohort of high-risk women: a comparative analysis of BRCA1 and BRCA2 mutations in American families of European and African ancestry. *JAMA*, 294(15):1925–1933, October 2005.
- [6] Huo D, Senie RT, Daly M, Buys SS, Cummings S, Ogutha J, Hope K, and Olopade OI. Prediction of BRCA Mutations Using the BRCAPRO Model in Clinic-Based African American, Hispanic, and Other Minority Families in the United States. *Journal of Clinical Oncology*, 27(8):1184–1190, March 2009.
- [7] Jasmine F, Ahsan H, Andrulis IL, John EM, Chang-Claude J, and Kibriya MG. Whole-genome amplification enables accurate genotyping for microarray-based high-density single nucleotide polymorphism array. *Cancer Epidemiology, Biomarkers & Prevention: A Publication of the American Association for Cancer Research, Cosponsored by the American Society of Preventive Oncology*, 17(12):3499–3508, December 2008.

- [8] Guo Y, He J, Zhao S, Wu H, Zhong X, Sheng Q, Samuels DC, Shyr Y, and Long J. Illumina human exome genotyping array clustering and quality control. *Nature protocols*, 9(11):2643–2662, November 2014.
- [9] Yang J, Lee SH, Goddard ME, and Visscher PM. GCTA: a tool for genome-wide complex trait analysis. *American Journal of Human Genetics*, 88(1):76–82, January 2011.
- [10] Price AL, Patterson NJ, Plenge RM, Weinblatt ME, Shadick NA, and Reich D. Principal components analysis corrects for stratification in genome-wide association studies. *Nature Genetics*, 38(8):904–909, August 2006.
- [11] Ahsan H, Halpern J, Kibriya MG, Pierce BL, Tong L, Gamazon E, McGuire V, Felberg A, Shi J, Jasmine F, Roy S, Brutus R, Argos M, Melkonian S, Chang-Claude J, Andrulis I, Hopper JL, John EM, Malone K, Ursin G, Gammon MD, Thomas DC, Seminara D, Casey G, Knight JA, Southey MC, Giles GG, Santella RM, Lee E, Conti D, Duggan D, Gallinger S, Haile R, Jenkins M, Lindor NM, Newcomb P, Michailidou K, Apicella C, Park DJ, Peto J, Fletcher O, Silva IdS, Lathrop M, Hunter DJ, Chanock SJ, Meindl A, Schmutzler RK, Müller-Myhsok B, Lochmann M, Beckmann L, Hein R, Makalic E, Schmidt DF, Bui QM, Stone J, Flesch-Janys D, Dahmen N, Nevanlinna H, Aittomäki K, Blomqvist C, Hall P, Czene K, Irwanto A, Liu J, Rahman N, Turnbull C, Study ftFBC, Dunning AM, Pharoah P, Waisfisz Q, Meijers-Heijboer H, Uitterlinden AG, Rivadeneira F, Nicolae D, Easton DF, Cox NJ, and Whittemore AS. A genome-wide association study of early-onset breast cancer identifies PFKM as a novel breast cancer gene and supports a common genetic spectrum for breast cancer at any age. *Cancer Epidemiology Biomarkers & Prevention*, 23(4):658–669, April 2014.
- [12] Michigan Imputation Server. <https://imputationserver.sph.umich.edu/index.html>, August 2016.
- [13] Delaneau O, Marchini J, and Zagury JF. A linear complexity phasing method for thousands of genomes. *Nature Methods*, 9(2):179–181, February 2012.
- [14] Fuchsberger C, Abecasis GR, and Hinds DA. minimac2: faster genotype imputation. *Bioinformatics*, 31(5):782–784, March 2015.
- [15] Wood AR, Perry JRB, Tanaka T, Hernandez DG, Zheng HF, Melzer D, Gibbs JR, Nalls MA, Weedon MN, Spector TD, Richards JB, Bandinelli S, Ferrucci L, Singleton AB, and Frayling TM. Imputation of variants from the 1000 Genomes Project modestly improves known associations and can identify low-frequency variant-phenotype associations undetected by HapMap based imputation. *PLoS One*, 8(5):e64343, 2013.

- [16] Yang J, Bakshi A, Zhu Z, Hemani G, Vinkhuyzen AAE, Lee SH, Robinson MR, Perry JRB, Nolte IM, van Vliet-Ostaptchouk JV, Snieder H, The LifeLines Cohort Study, Esko T, Milani L, Mägi R, Metspalu A, Hamsten A, Magnusson PKE, Pedersen NL, Ingelsson E, Soranzo N, Keller MC, Wray NR, Goddard ME, and Visscher PM. Genetic variance estimation with imputed variants finds negligible missing heritability for human height and body mass index. *Nature Genetics*, 47(10):1114–1120, October 2015.
- [17] The 1000 Genomes Project Consortium. A global reference for human genetic variation. *Nature*, 526(7571):68–74, October 2015.
- [18] Broad Institute Birdsuite. <http://archive.broadinstitute.org/mpg/birdsuite/birdseed.html>.
- [19] Azzato EM, Driver KE, Lesueur F, Shah M, Greenberg D, Easton DF, Teschendorff AE, Caldas C, Caporaso NE, and Pharoah PD. Effects of common germline genetic variation in cell cycle control genes on breast cancer survival: results from a population-based cohort. *Breast Cancer Research*, 10:R47, 2008.
- [20] Azzato EM, Pharoah PDP, Harrington P, Easton DF, Greenberg D, Caporaso NE, Chanock SJ, Hoover RN, Thomas G, Hunter DJ, and Kraft P. A genome-wide association study of prognosis in breast cancer. *Cancer Epidemiology, Biomarkers & Prevention: A Publication of the American Association for Cancer Research, Cosponsored by the American Society of Preventive Oncology*, 19(4):1140–1143, April 2010.
- [21] Rafiq S, Khan S, Tapper W, Collins A, Upstill-Goddard R, Gerty S, Blomqvist C, Aittomäki K, Couch FJ, Liu J, Nevanlinna H, and Eccles D. A Genome Wide Meta-Analysis Study for Identification of Common Variation Associated with Breast Cancer Prognosis. *PLOS ONE*, 9(12):e101488, December 2014.
- [22] Guo Q, Schmidt MK, Kraft P, Canisius S, Chen C, Khan S, Tyrer J, Bolla MK, Wang Q, Dennis J, Michailidou K, Lush M, Kar S, Beesley J, Dunning AM, Shah M, Czene K, Darabi H, Eriksson M, Lambrechts D, Weltens C, Leunen K, Bojesen SE, Nordestgaard BG, Nielsen SF, Flyger H, Chang-Claude J, Rudolph A, Seibold P, Flesch-Janys D, Blomqvist C, Aittomäki K, Fagerholm R, Muranen TA, Couch FJ, Olson JE, Vachon C, Andrulis IL, Knight JA, Glendon G, Mulligan AM, Broeks A, Hogervorst FB, Haiman CA, Henderson BE, Schumacher F, Marchand LL, Hopper JL, Tsimiklis H, Apicella C, Southey MC, Cox A, Cross SS, Reed MWR, Giles GG, Milne RL, McLean C, Winqvist R, Pylkäs K, Jukkola-Vuorinen A, Grip M, Hooning MJ, Hollestelle A, Martens JWM, Ouweland AMWvd, Marme F, Schneeweiss A, Yang R, Burwinkel B, Figueroa J, Chanock SJ, Lissowska J, Sawyer EJ, Tomlinson I, Kerin MJ, Miller N, Brenner H, Dieffenbach AK, Arndt V, Hollecsek B, Mannermaa A,

- Kataja V, Kosma VM, Hartikainen JM, Li J, Brand JS, Humphreys K, Devilee P, Tollenaar RAEM, Seynaeve C, Radice P, Peterlongo P, Bonanni B, Mariani P, Fasching PA, Beckmann MW, Hein A, Ekici AB, Chenevix-Trench G, Balleine R, Investigators k, Phillips KA, Benitez J, Zamora MP, Perez JIA, Menéndez P, Jakubowska A, Lubinski J, Jaworska-Bieniek K, Durda K, Hamann U, Kabisch M, Ulmer HU, Rüdiger T, Margolin S, Kristensen V, Nord S, Evans DG, Abraham JE, Earl HM, Hiller L, Dunn JA, Bowden S, Berg C, Campa D, Diver WR, Gapstur SM, Gaudet MM, Hankinson SE, Hoover RN, Hüsing A, Kaaks R, Machiela MJ, Willett W, Barrdahl M, Canzian F, Chin SF, Caldas C, Hunter DJ, Lindstrom S, García-Closas M, Hall P, Easton DF, Eccles DM, Rahman N, Nevanlinna H, and Pharoah PDP. Identification of Novel Genetic Markers of Breast Cancer Survival. *Journal of the National Cancer Institute*, 107(5):d1v081, May 2015.
- [23] Shu XO, Long J, Lu W, Li C, Chen WY, Delahanty R, Cheng J, Cai H, Zheng Y, Shi J, Gu K, Wang WJ, Kraft P, Gao YT, Cai Q, and Zheng W. Novel Genetic Markers of Breast Cancer Survival Identified by a Genome-Wide Association Study. *Cancer Research*, 72(5):1182–1189, March 2012.
- [24] Khan S, Fagerholm R, Rafiq S, Tapper W, Aittomäki K, Liu J, Blomqvist C, Eccles D, and Nevanlinna H. Polymorphism at 19q13.41 Predicts Breast Cancer Survival Specifically after Endocrine Therapy. *Clinical Cancer Research: An Official Journal of the American Association for Cancer Research*, 21(18):4086–4096, September 2015.
- [25] Fagerholm R, Schmidt MK, Khan S, Rafiq S, Tapper W, Aittomäki K, Greco D, Heikkinen T, Muranen TA, Fasching PA, Janni W, Weinshilboum R, Loehberg CR, Hopper JL, Southey MC, Keeman R, Lindblom A, Margolin S, Mannermaa A, Kataja V, Chenevix-Trench G, kConFab Investigators, Lambrechts D, Wildiers H, Chang-Claude J, Seibold P, Couch FJ, Olson JE, Andrulis IL, Knight JA, García-Closas M, Figueroa J, Hooning MJ, Jager A, Shah M, Perkins BJ, Luben R, Hamann U, Kabisch M, Czene K, Hall P, Easton DF, Pharoah PDP, Liu J, Eccles D, Blomqvist C, and Nevanlinna H. The SNP rs6500843 in 16p13.3 is associated with survival specifically among chemotherapy-treated breast cancer patients. *Oncotarget*, 6(10):7390–7407, April 2015.
- [26] Rafiq S, Tapper W, Collins A, Khan S, Politopoulos I, Gerty S, Blomqvist C, Couch FJ, Nevanlinna H, Liu J, and Eccles D. Identification of inherited genetic variations influencing prognosis in early-onset breast cancer. *Cancer Research*, 73(6):1883–1891, March 2013.
- [27] Kiyotani K, Mushiroda T, Tsunoda T, Morizono T, Hosono N, Kubo M, Tanigawara Y, Imamura CK, Flockhart DA, Aki F, Hirata K, Takatsuka Y, Okazaki M, Ohsumi S, Yamakawa T, Sasa M, Nakamura Y, and Zembutsu H. A genome-wide association study identifies locus at 10q22 associated with clinical

outcomes of adjuvant tamoxifen therapy for breast cancer patients in Japanese. *Human Molecular Genetics*, 21(7):1665–1672, April 2012.

- [28] Song N, Choi JY, Sung H, Jeon S, Chung S, Park SK, Han W, Lee JW, Kim MK, Lee JY, Yoo KY, Han BG, Ahn SH, Noh DY, and Kang D. Prediction of breast cancer survival using clinical and genetic markers by tumor subtypes. *PloS One*, 10(4):e0122413, 2015.



# Supplemental Figures and Tables

Figure 1: Schematic of Variants Used in Primary Analysis

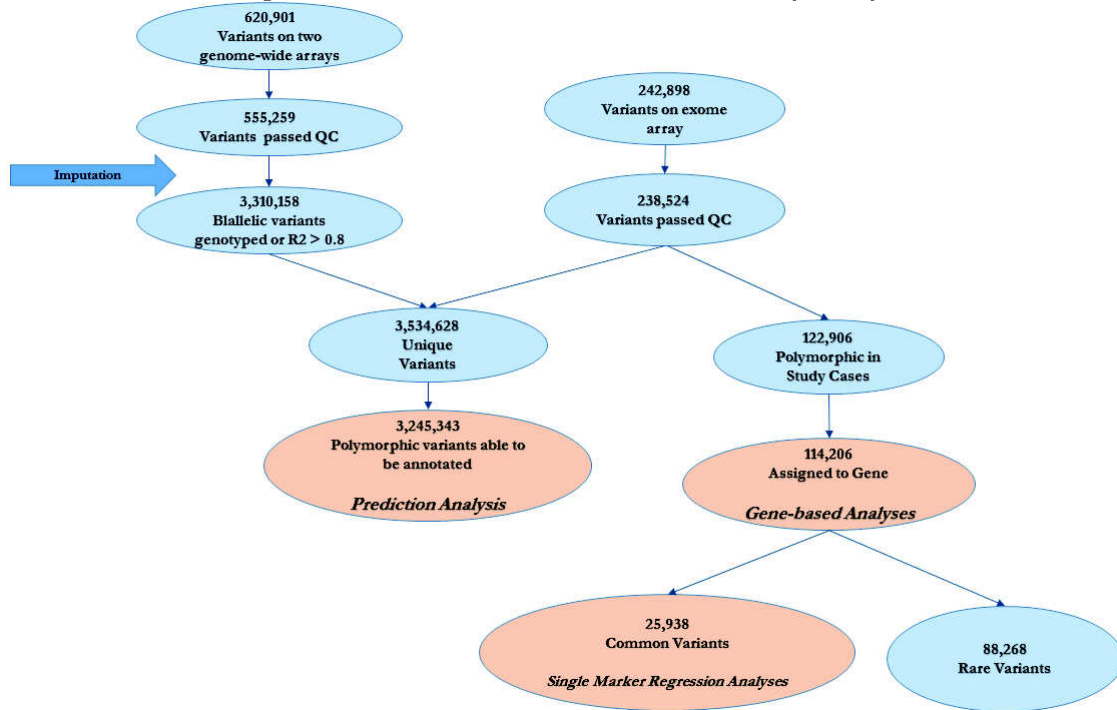

Figure 2: Variants Used in Replication Analysis

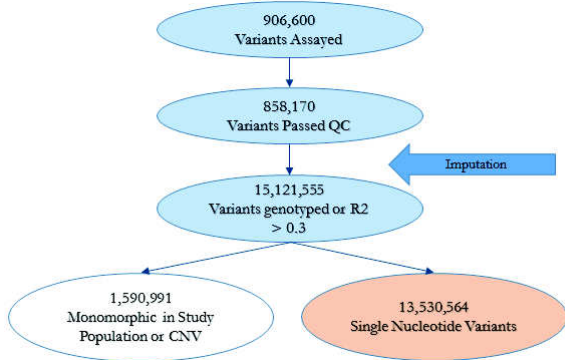

Table 1: Genome-wide Studies of the Association between Germline Genetic Variation and Breast Cancer Mortality

| Study Title                                                                                                                                                                    | Year | Population Description                                                                                        | Outcome                         | N    | Median Follow Up Time | Events | Variants                        | Replication Description                                                                                                   | Findings                                                                                                      |
|--------------------------------------------------------------------------------------------------------------------------------------------------------------------------------|------|---------------------------------------------------------------------------------------------------------------|---------------------------------|------|-----------------------|--------|---------------------------------|---------------------------------------------------------------------------------------------------------------------------|---------------------------------------------------------------------------------------------------------------|
| A Genome-Wide Association Study of Prognosis in Breast Cancer <sup>20</sup>                                                                                                    | 2010 | Postmenopausal women with invasive breast cancer                                                              | Breast cancer specific survival | 1145 | 6 years               | 93     | 528,252                         | Top 10 genotyped in 4335 women with invasive breast cancer with 38,148 years at risk                                      | Nothing genome-wide significant                                                                               |
| A Genome-wide Association Study Identifies Locus at 10q22 Associated with Clinical Outcomes of Adjuvant Tamoxifen Therapy for Breast Cancer Patients in Japanese <sup>27</sup> | 2011 | Japanese patients with hormone receptor-positive, invasive breast cancer receiving adjuvant tamoxifen therapy | Recurrence-free survival        | 240  | 7 years               | 30     | 470,796                         | Two independent sets of 105 and 117 cases                                                                                 | 15 SNVs in the primary analysis; rs10509373 (chr10:76397814) replicated (combined $p = 1.26 \cdot 10^{-10}$ ) |
| Novel Genetic Markers of Breast Cancer Survival Identified by a Genome-Wide Association Study <sup>23</sup>                                                                    | 2012 | Shanghai-resident Chinese women                                                                               | Total mortality                 | 1950 | 6 years               | 299    | 613,031                         | Top 49 associations replicated in 4160 Shanghai women with breast cancer; Top association examined in Nurses Health Study | rs3784099 (chr14:68283210; $p = 1.44 \cdot 10^{-8}$ in discovery only)                                        |
| Identification of Inherited Genetic Variations Influencing Prognosis in Early-onset Breast Cancer <sup>26</sup>                                                                | 2013 | UK women aged 40 or younger at diagnosis                                                                      | Breast cancer specific survival | 536  | 4 years               | 236    | 487,496                         | Top 35 associations genotyped in 1,516 independent cases from the same early-onset cohort                                 | Nothing genome-wide significant                                                                               |
| Genome Wide Meta-Analysis Study for Identification of Common Variation Associated with Breast Cancer Prognosis <sup>21</sup>                                                   | 2014 | UK women aged 40 or younger at diagnosis, and Finish women of all ages                                        | Breast cancer specific survival | 1341 | 6 years               | 237    | 475,141, imputed to 7.5 million | 1523 additional participants of the POSH study                                                                            | Nothing genome-wide significant                                                                               |

positions refer to the HG19 assembly

Studies that published both single-study results and contributed to a meta analysis will be represented twice

Table 2: Genome-wide Studies of the Association between Germline Genetic Variation and Breast Cancer Mortality(Continued)

| Study Title                                                                                                 | Year | Population Description                                                                  | Outcome                         | N      | Median Follow Up Time | Events | Variants                              | Replication Description                                                                                                                                                       | Findings                                                                                                                                         |
|-------------------------------------------------------------------------------------------------------------|------|-----------------------------------------------------------------------------------------|---------------------------------|--------|-----------------------|--------|---------------------------------------|-------------------------------------------------------------------------------------------------------------------------------------------------------------------------------|--------------------------------------------------------------------------------------------------------------------------------------------------|
| Identification of Novel Genetic Markers of Breast Cancer Survival <sup>22</sup>                             | 2015 | Meta-analysis of studies in populations of European ancestry                            | Breast cancer specific survival | 37,954 | 5 years               | 2900   | 200,000-700,000; imputed to 9 million | N/A                                                                                                                                                                           | rs148760487 (chr2:162922103; $p = 1.5 \cdot 10^{-8}$ ) and 27 others in high LD; rs2059614 (chr11:125389528; $p = 1.3 \cdot 10^{-9}$ in ER-cases |
| Polymorphism at 19q13.41 Predicts Breast Cancer Survival Specifically after Endocrine Therapy <sup>24</sup> | 2015 | Meta analysis of UK women aged 40 or younger at diagnosis, and Finish women of all ages | Breast cancer specific survival | 1341   | 7 years               | 547    | 486,478                               | Two independent data sets with 5011 patients                                                                                                                                  | Nothing genome-wide significant                                                                                                                  |
| Prediction of Breast Cancer Survival Using Clinical and Genetic Markers by Tumor Subtypes <sup>28</sup>     | 2015 | Incident breast cancer cases in Seoul, South Korea                                      | Recurrence-free survival        | 1732   | 4 years               | 214    | 2,210,580 genotyped and imputed       | Any SNVs identified with $p < 10^{-6}$ and MAF $> .1$ , and any common variants in high ( $r^2 > 0.4$ ) LD with them were genotyped in 1494 additional women from South Korea | Nothing genome-wide significant                                                                                                                  |

positions refer to the HG19 assembly

Studies that published both single-study results and contributed to a meta analysis will be represented twice

Table 3: Studies Included in Primary Analysis

| Study Name                                             | Study Location      | Years Recruiting | Case Criteria                                                                                                | n with exome and genome-wide array | n with exome only |
|--------------------------------------------------------|---------------------|------------------|--------------------------------------------------------------------------------------------------------------|------------------------------------|-------------------|
| Breast Cancer Family Registry                          | Australia           | 1992-2000        | Living in the Melbourne and Sydney metro areas, family recruited from the Victoria and NSW cancer registries | 452                                | 24                |
| Breast Cancer Family Registry                          | New York, NY        | 1996-2000        | Living in New York, New Jersey, or Connecticut                                                               | 0                                  | 380               |
| Breast Cancer Family Registry                          | Northern California | 1996-2003        | SEER Cancer registry in the San Francisco metro area                                                         | 163                                | 9                 |
| Breast Cancer Family Registry                          | Ontario             | 2001-2010        | Ontario Cancer Registry                                                                                      | 482                                | 77                |
| Breast Cancer Family Registry                          | Philadelphia, PA    | 1996-2000        | Living in Philadelphia                                                                                       | 0                                  | 265               |
| Breast Cancer Family Registry                          | Utah                | 1996-2012        | Living in Salt Lake City                                                                                     | 0                                  | 96                |
| Genetic Epidemiologic Study of Breast Cancer by Age 50 | Germany             | 1992-1995        | 38 clinics in the Rhein-Neckar-Odenwald and Freiburg regions                                                 | 377                                | 5                 |
| Long Island Breast Cancer Study Project                | New York            | 1996-1999        | Nassau and Suffolk counties                                                                                  | 144                                | 1                 |
| Seattle                                                | Seattle, WA         | 1990-1992        | King, Pierce, and Snohomish counties; age less than 45 at diagnosis                                          | 285                                | 3                 |
| University of Chicago                                  | Chicago, IL         | 1998-2010        | Treated at the University of Chicago Cancer Center                                                           | 0                                  | 191               |

Participants are those included in the analysis after QC

Table 4: Most Significant Variants Identified by Single Marker Cox Regression with Hazard of All-Cause Mortality

| Chr:Position <sup>a</sup> | Gene    | Function <sup>b</sup> | Minor Allele | Major Allele | MAF   | Primary Analysis |           |       | TCGA          |           |
|---------------------------|---------|-----------------------|--------------|--------------|-------|------------------|-----------|-------|---------------|-----------|
|                           |         |                       |              |              |       | HR(se)           | p-value   | MAF   | HR(se)        | p-value   |
| 6:35430686                | FANCE   | nonsynonymous SNV     | G            | A            | 0.055 | 1.576 (0.156)    | 4.177E-06 | 0.056 | 1.169 (0.413) | 6.593E-01 |
| 1:116310967               | CASQ2   | nonsynonymous SNV     | T            | C            | 0.287 | 1.265 (0.071)    | 3.061E-05 | 0.256 | 0.831 (0.166) | 3.544E-01 |
| 20:1551564                | SIRPB1  | nonsynonymous SNV     | T            | C            | 0.018 | 1.903 (0.304)    | 5.508E-05 | 0.028 | 0.486 (0.285) | 2.186E-01 |
| 8:19819724                | LPL     | stopgain              | C            | G            | 0.100 | 1.367 (0.111)    | 1.190E-04 | 0.087 | 1.128 (0.306) | 6.582E-01 |
| 17:66364691               | ARSG    | nonsynonymous SNV     | C            | G            | 0.429 | 0.821 (0.043)    | 1.651E-04 | 0.435 | 1.165 (0.203) | 3.799E-01 |
| 2:87044316                | CD8B    | intronic              | A            | G            | 0.222 | 0.780 (0.052)    | 2.189E-04 | 0.212 | 1.033 (0.210) | 8.741E-01 |
| 6:35423886                | FANCE   | nonsynonymous SNV     | C            | T            | 0.014 | 1.915 (0.337)    | 2.216E-04 | 0.015 | 2.155 (1.296) | 2.017E-01 |
| 10:108543337              | SORCS1  | intronic              | A            | G            | 0.413 | 0.821 (0.044)    | 2.535E-04 | 0.398 | 1.076 (0.178) | 6.588E-01 |
| 3:52833219                | ITIH3   | intronic              | G            | A            | 0.347 | 0.812 (0.046)    | 2.613E-04 | 0.363 | 0.762 (0.142) | 1.449E-01 |
| 6:34730395                | SNRPC   | synonymous SNV        | C            | T            | 0.014 | 1.915 (0.349)    | 3.569E-04 | 0.015 | 1.830 (1.098) | 3.137E-01 |
| 2:179545859               | TTN     | nonsynonymous SNV     | C            | T            | 0.289 | 1.218 (0.068)    | 4.411E-04 | 0.342 | 1.152 (0.189) | 3.888E-01 |
| 2:179432185               | TTN     | nonsynonymous SNV     | A            | G            | 0.288 | 1.215 (0.068)    | 5.382E-04 | 0.342 | 1.165 (0.191) | 3.498E-01 |
| 13:52343391               | DHRS12  | nonsynonymous SNV     | C            | T            | 0.064 | 0.646 (0.082)    | 5.490E-04 | 0.080 | 1.255 (0.294) | 3.324E-01 |
| 14:24458162               | DHRS4L2 | nonsynonymous SNV     | G            | C            | 0.332 | 1.203 (0.065)    | 5.882E-04 | 0.384 | 0.659 (0.132) | 3.687E-02 |
| 3:52874288                | TMEM110 | UTR3                  | T            | C            | 0.243 | 0.801 (0.052)    | 6.107E-04 | 0.264 | 0.866 (0.167) | 4.550E-01 |
| 1:205318321               | KLHDC8A | intronic              | C            | T            | 0.387 | 0.831 (0.045)    | 6.879E-04 | 0.410 | 0.884 (0.142) | 4.431E-01 |
| 7:123599845               | SPAM1   | nonsynonymous SNV     | A            | T            | 0.021 | 1.685 (0.261)    | 7.551E-04 | 0.016 | 1.996 (1.204) | 2.521E-01 |
| 18:31645379               | NOL4    | intronic              | G            | A            | 0.421 | 0.834 (0.045)    | 7.745E-04 | 0.420 | 1.198 (0.203) | 2.865E-01 |
| 5:131995964               | IL13    | synonymous SNV        | G            | A            | 0.196 | 1.236 (0.078)    | 7.746E-04 | 0.205 | 1.160 (0.270) | 5.230E-01 |
| 11:124294703              | OR8B4   | nonsynonymous SNV     | T            | C            | 0.303 | 1.200 (0.065)    | 8.169E-04 | 0.307 | 1.127 (0.213) | 5.260E-01 |

a: positions refer to the HG19 assembly

b: annotation from ANNOVAR

HR(se) = Hazard Ratio(Standard Error)

Table 5: Most Significant Variants Identified by Single Marker Cox Regression with Hazard of All-Cause Mortality in Cases with ER+ Tumors

| Chr:Position <sup>a</sup> | Gene        | Function <sup>b</sup> | Minor Allele | Major Allele | MAF   | Primary Analysis |           | TCGA  |               |           |
|---------------------------|-------------|-----------------------|--------------|--------------|-------|------------------|-----------|-------|---------------|-----------|
|                           |             |                       |              |              |       | HR(se)           | p-value   | MAF   | HR(se)        | p-value   |
| 6:26017542                | HIST1H1A    | nonsynonymous SNV     | T            | C            | 0.102 | 1.877 (0.284)    | 3.119E-05 | 0.090 | 0.577 (0.249) | 2.022E-01 |
| 21:45503121               | TRAPPC10    | nonsynonymous SNV     | G            | A            | 0.175 | 1.510 (0.162)    | 1.239E-04 | 0.162 | 1.165 (0.330) | 5.889E-01 |
| 1:248059476               | OR2W3       | synonymous SNV        | C            | A            | 0.204 | 0.615 (0.080)    | 1.775E-04 | 0.175 | 1.080 (0.265) | 7.550E-01 |
| 6:133119564               | SLC18B1     | nonsynonymous SNV     | C            | A            | 0.031 | 2.094 (0.421)    | 2.343E-04 | 0.033 | 1.719 (1.038) | 3.701E-01 |
| 20:34218673               | CPNE1       | nonsynonymous SNV     | G            | C            | 0.109 | 1.552 (0.186)    | 2.440E-04 | 0.112 | 1.082 (0.320) | 7.895E-01 |
| 7:45148667                | TBRG4       | nonsynonymous SNV     | G            | A            | 0.170 | 1.473 (0.157)    | 2.882E-04 | 0.186 | 0.774 (0.175) | 2.569E-01 |
| 1:161751741               | ATF6        | nonsynonymous SNV     | A            | G            | 0.277 | 0.676 (0.074)    | 3.193E-04 | 0.282 | 1.029 (0.255) | 9.097E-01 |
| 15:83254708               | CPEB1       | intronic              | A            | G            | 0.384 | 0.705 (0.069)    | 3.559E-04 | 0.361 | 1.117 (0.230) | 5.902E-01 |
| 18:23866185               | TAF4B       | nonsynonymous SNV     | G            | C            | 0.108 | 0.520 (0.095)    | 3.692E-04 | 0.095 | 0.602 (0.266) | 2.506E-01 |
| 21:45506819               | TRAPPC10    | synonymous SNV        | T            | C            | 0.192 | 1.457 (0.155)    | 4.007E-04 | 0.173 | 1.261 (0.335) | 3.815E-01 |
| 22:18611223               | TUBA8       | intronic              | A            | G            | 0.188 | 1.458 (0.156)    | 4.238E-04 | 0.195 | 0.813 (0.247) | 4.960E-01 |
| 3:9871030                 | ARPC4-TTLL3 | synonymous SNV        | G            | T            | 0.289 | 1.387 (0.129)    | 4.596E-04 | 0.290 | 1.223 (0.265) | 3.531E-01 |
| 19:54603419               | OSCAR       | intronic              | C            | T            | 0.448 | 1.368 (0.124)    | 5.670E-04 | 0.422 | 1.021 (0.220) | 9.234E-01 |
| 14:24805463               | RIPK3       | nonsynonymous SNV     | G            | T            | 0.063 | 1.685 (0.256)    | 6.057E-04 | 0.070 | 0.485 (0.255) | 1.687E-01 |
| 1:161915501               | ATF6        | intronic              | G            | A            | 0.402 | 1.356 (0.121)    | 6.125E-04 | 0.401 | 1.206 (0.261) | 3.870E-01 |
| 14:39736680               | CTAGE5      | synonymous SNV        | C            | T            | 0.063 | 1.751 (0.287)    | 6.184E-04 | 0.054 | 1.237 (0.439) | 5.480E-01 |
| 20:34502107               | PHF20       | nonsynonymous SNV     | G            | A            | 0.105 | 1.519 (0.187)    | 6.761E-04 | 0.115 | 0.993 (0.294) | 9.823E-01 |
| 17:66289041               | ARSG        | intronic              | G            | T            | 0.418 | 1.354 (0.121)    | 6.775E-04 | 0.428 | 1.164 (0.265) | 5.052E-01 |
| 6:31237124                | HLA-C       | synonymous SNV        | C            | T            | 0.292 | 0.616 (0.088)    | 6.776E-04 | 0.311 | 1.143 (0.273) | 5.769E-01 |
| 11:18586122               | UEVLD       | intronic              | C            | T            | 0.332 | 0.714 (0.071)    | 6.853E-04 | 0.352 | 0.938 (0.199) | 7.628E-01 |

a: positions refer to the HG19 assembly

b: annotation from ANNOVAR

HR(se) = Hazard Ratio(Standard Error)

Table 6: Association with Mortality of Variants Previously Identified with Breast Cancer Phenotypes

| chr:position <sup>a</sup> | first author    | journal                  | year | reported trait       | reported p-value | p-value in primary analysis | p-value in primary analysis of ER+ cases |
|---------------------------|-----------------|--------------------------|------|----------------------|------------------|-----------------------------|------------------------------------------|
| chr1:114448389            | Michailidou K   | Nat Genet                | 2013 | breast cancer        | 2.00E-08         | 5.09E-01                    | 1.97E-01                                 |
| chr1:121280613            | Thomas G        | Nat Genet                | 2009 | breast cancer        | 7.00E-10         | 9.72E-02                    | 3.42E-01                                 |
| chr1:121280613            | Michailidou K   | Nat Genet                | 2013 | breast cancer        | 2.00E-26         | 9.72E-02                    | 3.42E-01                                 |
| chr3:27416013             | Fletcher O      | J Natl Cancer Inst       | 2011 | breast cancer        | 2.00E-08         | 1.34E-01                    | 1.69E-01                                 |
| chr3:27416013             | Michailidou K   | Nat Genet                | 2013 | breast cancer        | 2.00E-30         | 1.34E-01                    | 1.69E-01                                 |
| chr6:127600630            | Gold B          | Proc Natl Acad Sci U S A | 2008 | breast cancer        | 3.00E-08         | 1.30E-01                    | 9.86E-01                                 |
| chr6:151914113            | Michailidou K   | Nat Genet                | 2013 | breast cancer        | 2.00E-21         | 2.91E-01                    | 8.34E-01                                 |
| chr8:128355618            | Michailidou K   | Nat Genet                | 2013 | breast cancer        | 1.00E-27         | 5.02E-01                    | 9.12E-01                                 |
| chr8:128355618            | Easton DF       | Nature                   | 2007 | breast cancer        | 5.00E-12         | 5.02E-01                    | 9.12E-01                                 |
| chr8:128387852            | Fletcher O      | J Natl Cancer Inst       | 2011 | breast cancer        | 3.00E-11         | 9.35E-02                    | 2.04E-01                                 |
| chr9:22062134             | Turnbull C      | Nat Genet                | 2010 | breast cancer        | 3.00E-08         | 5.60E-01                    | 2.61E-01                                 |
| chr10:64278682            | Lindstrom S     | Nat Genet                | 2011 | mammographic density | 1.00E-09         | 4.92E-01                    | 4.17E-01                                 |
| chr10:64278682            | Michailidou K   | Nat Genet                | 2013 | breast cancer        | 1.00E-36         | 4.92E-01                    | 4.17E-01                                 |
| chr10:64278682            | Turnbull C      | Nat Genet                | 2010 | breast cancer        | 5.00E-15         | 4.92E-01                    | 4.17E-01                                 |
| chr10:64278682            | Lindstrom S     | Nat Commun               | 2014 | mammographic density | 1.00E-16         | 4.92E-01                    | 4.17E-01                                 |
| chr10:80841148            | Michailidou K   | Nat Genet                | 2013 | breast cancer        | 7.00E-22         | 2.83E-01                    | 8.93E-01                                 |
| chr10:80841148            | Turnbull C      | Nat Genet                | 2010 | breast cancer        | 4.00E-09         | 2.83E-01                    | 8.93E-01                                 |
| chr10:123337335           | Michailidou K   | Nat Genet                | 2013 | breast cancer        | 2.00E-170        | 1.63E-01                    | 5.41E-01                                 |
| chr10:123337335           | Thomas G        | Nat Genet                | 2009 | breast cancer        | 2.00E-10         | 1.63E-01                    | 5.41E-01                                 |
| chr10:123337335           | Turnbull C      | Nat Genet                | 2010 | breast cancer        | 4.00E-31         | 1.63E-01                    | 5.41E-01                                 |
| chr10:123346116           | Gaudet MM       | PLoS Genet               | 2010 | breast cancer        | 1.00E-08         | 1.64E-01                    | 2.84E-01                                 |
| chr10:123346190           | Li J            | Breast Cancer Res Treat  | 2010 | breast cancer        | 2.00E-13         | 1.75E-01                    | 2.71E-01                                 |
| chr10:123346190           | Fletcher O      | J Natl Cancer Inst       | 2011 | breast cancer        | 1.00E-30         | 1.75E-01                    | 2.71E-01                                 |
| chr10:123346190           | Hunter DJ       | Nat Genet                | 2007 | breast cancer        | 1.00E-10         | 1.75E-01                    | 2.71E-01                                 |
| chr10:123352317           | Easton DF       | Nature                   | 2007 | breast cancer        | 2.00E-76         | 2.25E-01                    | 3.77E-01                                 |
| chr11:1909006             | Lindstrom S     | Nat Commun               | 2014 | mammographic density | 1.00E-10         | 2.62E-01                    | 4.84E-01                                 |
| chr11:1909006             | Easton DF       | Nature                   | 2007 | breast cancer        | 3.00E-09         | 2.62E-01                    | 4.84E-01                                 |
| chr11:1909006             | Michailidou K   | Nat Genet                | 2013 | breast cancer        | 2.00E-11         | 2.62E-01                    | 4.84E-01                                 |
| chr14:69034682            | Michailidou K   | Nat Genet                | 2013 | breast cancer        | 3.00E-19         | 9.03E-01                    | 1.66E-01                                 |
| chr16:52586341            | Low SK          | PLoS One                 | 2013 | breast cancer        | 3.00E-11         | 9.85E-01                    | 8.44E-01                                 |
| chr16:52586341            | Thomas G        | Nat Genet                | 2009 | breast cancer        | 1.00E-09         | 9.85E-01                    | 8.44E-01                                 |
| chr16:52586341            | Michailidou K   | Nat Genet                | 2013 | breast cancer        | 2.00E-114        | 9.85E-01                    | 8.44E-01                                 |
| chr16:52586341            | Turnbull C      | Nat Genet                | 2010 | breast cancer        | 3.00E-15         | 9.85E-01                    | 8.44E-01                                 |
| chr16:52586341            | Stacey SN       | Nat Genet                | 2007 | breast cancer        | 6.00E-19         | 9.85E-01                    | 8.44E-01                                 |
| chr16:52586341            | Garcia-Closas M | Nat Genet                | 2013 | breast cancer        | 6.00E-13         | 9.85E-01                    | 8.44E-01                                 |
| chr16:52586341            | Orr N           | Nat Genet                | 2012 | breast cancer        | 4.00E-15         | 9.85E-01                    | 8.44E-01                                 |
| chr16:52586341            | Easton DF       | Nature                   | 2007 | breast cancer        | 1.00E-36         | 9.85E-01                    | 8.44E-01                                 |
| chr16:52599188            | Fejerman L      | Nat Commun               | 2014 | breast cancer        | 3.00E-09         | 9.04E-01                    | 9.62E-01                                 |
| chr16:52599188            | Long J          | PLoS Genet               | 2010 | breast cancer        | 1.00E-28         | 9.04E-01                    | 9.62E-01                                 |
| chr16:52635164            | Fletcher O      | J Natl Cancer Inst       | 2011 | breast cancer        | 4.00E-10         | 2.96E-01                    | 7.03E-02                                 |
| chr16:53813367            | Michailidou K   | Nat Genet                | 2013 | breast cancer        | 6.00E-14         | 1.47E-01                    | 8.37E-02                                 |
| chr19:17389704            | Antoniou AC     | Nat Genet                | 2010 | breast cancer        | 2.00E-09         | 7.78E-01                    | 2.57E-01                                 |
| chr19:17389704            | Garcia-Closas M | Nat Genet                | 2013 | breast cancer        | 9.00E-13         | 7.78E-01                    | 2.57E-01                                 |
| chr19:17389704            | Couch FJ        | PLoS Genet               | 2013 | breast cancer        | 4.00E-13         | 7.78E-01                    | 2.57E-01                                 |
| chr19:17392894            | Siddiq A        | Hum Mol Genet            | 2012 | breast cancer        | 4.00E-08         | 5.18E-01                    | 1.04E-01                                 |
| chr19:17394124            | Purrington KS   | Carcinogenesis           | 2013 | breast cancer        | 2.00E-08         | 5.26E-01                    | 1.09E-01                                 |

a: positions refer to the HG19 assembly

Table 7: Most Significant Genes Identified by SKAT-O Cox Regression with Hazard of All-Cause Mortality

| Gene     | Exome Chip         |                  |          | TCGA               |                  |          |
|----------|--------------------|------------------|----------|--------------------|------------------|----------|
|          | Minor Allele Count | Variants in Gene | p-value  | Minor Allele Count | Variants in Gene | p-value  |
| ANP32D   | 218                | 2                | 1.21e-04 | 5181               | 16               | 5.93e-01 |
| ARSG     | 4731               | 15               | 1.86e-04 | 225451             | 810              | 5.97e-01 |
| CHAF1A   | 884                | 14               | 1.19e-03 | 66951              | 97               | 4.37e-01 |
| CLCF1    | 7                  | 3                | 4.72e-04 | 147                | 3                | 1.85e-01 |
| DHRS12   | 525                | 4                | 2.16e-04 | 26783              | 153              | 4.38e-01 |
| FANCE    | 215                | 6                | 1.05e-05 | 16131              | 97               | 5.01e-01 |
| FPR1     | 2654               | 10               | 1.33e-03 | 18939              | 56               | 9.59e-02 |
| HOXD12   | 72                 | 4                | 4.30e-04 | 3207               | 9                | 1.02e-01 |
| HOXD13   | 714                | 3                | 1.34e-03 | 3600               | 17               | 6.82e-01 |
| KIAA1683 | 10879              | 33               | 9.63e-04 | 71392              | 149              | 1.52e-01 |
| KLHDC8A  | 1143               | 2                | 6.62e-04 | 79783              | 157              | 8.27e-01 |
| LPL      | 387                | 7                | 2.16e-04 | 49468              | 181              | 9.15e-01 |
| NEK4     | 1307               | 9                | 1.19e-03 | 87145              | 224              | 8.04e-01 |
| PNPLA3   | 2542               | 10               | 1.08e-03 | 58831              | 153              | 3.74e-02 |
| SNRPC    | 45                 | 2                | 1.17e-03 | 37183              | 103              | 3.71e-01 |
| TM9SF3   | 2                  | 1                | 4.36e-04 | 74752              | 358              | 6.46e-01 |
| TMEM110  | 757                | 3                | 4.53e-04 | 78067              | 249              | 5.50e-01 |
| UBE2Q2   | 5                  | 2                | 1.51e-04 | 38709              | 180              | 3.98e-01 |
| VSX1     | 590                | 5                | 6.85e-04 | 19808              | 57               | 4.36e-01 |
| WDR12    | 364                | 4                | 5.35e-04 | 27693              | 127              | 8.09e-01 |

Table 8: Most Significant Genes Identified by SKAT-O Cox Regression with Hazard of All-Cause Mortality in ER+ Participants

| Gene        | Exome Chip         |                  |          | TCGA               |                  |          |
|-------------|--------------------|------------------|----------|--------------------|------------------|----------|
|             | Minor Allele Count | Variants in Gene | p-value  | Minor Allele Count | Variants in Gene | p-value  |
| ANKRD34C    | 8                  | 2                | 8.82e-04 | 5206               | 45               | 5.77e-01 |
| ARPC4-TTLL3 | 313                | 9                | 6.12e-04 | 23500              | 181              | 2.26e-01 |
| ATF6        | 492                | 6                | 4.61e-04 | 73059              | 829              | 2.70e-01 |
| BTN2A2      | 149                | 12               | 7.23e-04 | 7245               | 99               | 9.90e-01 |
| CCDC67      | 556                | 9                | 1.11e-03 | 85332              | 491              | 3.98e-01 |
| CPNE1       | 507                | 10               | 9.12e-04 | 10498              | 110              | 9.47e-01 |
| E2F5        | 0                  | 1                | 1.27e-03 | 10883              | 101              | 7.19e-01 |
| FGFR1OP2    | 1                  | 1                | 8.21e-04 | 10593              | 117              | 6.16e-02 |
| GBA         | 11                 | 3                | 6.53e-04 | 3951               | 29               | 4.20e-01 |
| ISLR2       | 20                 | 4                | 1.19e-03 | 71                 | 10               | 7.35e-02 |
| MAPK8IP1    | 15                 | 4                | 6.53e-04 | 3718               | 73               | 1.54e-02 |
| MARK2       | 3                  | 2                | 1.24e-03 | 25839              | 180              | 5.03e-01 |
| MED20       | 1                  | 1                | 8.23e-04 | 3079               | 50               | 7.95e-01 |
| SDC2        | 266                | 2                | 1.12e-03 | 71831              | 601              | 2.15e-01 |
| SLC18B1     | 105                | 6                | 7.09e-04 | 8425               | 175              | 2.99e-01 |
| STXBP4      | 284                | 2                | 9.49e-04 | 131435             | 842              | 2.87e-01 |
| TAF4B       | 409                | 6                | 1.14e-04 | 72213              | 721              | 5.11e-01 |
| TRPC1       | 1                  | 1                | 8.20e-04 | 28994              | 264              | 4.50e-01 |
| UEVLD       | 402                | 5                | 8.20e-04 | 25835              | 239              | 2.54e-01 |
| YPEL3       | 9                  | 2                | 1.25e-03 | 1049               | 9                | 8.73e-01 |

Table 9: Association with Mortality of Genes Previously Associated with Breast Cancer Mortality

| first author | journal            | year | chromosome | gene   | p-value in primary analysis | p-value in primary analysis of ER+ cases |
|--------------|--------------------|------|------------|--------|-----------------------------|------------------------------------------|
| Rafiq S      | Cancer Res         | 2013 | 1          | PBX1   | 6.45E-01                    | 5.01E-01                                 |
| Rafiq S      | Cancer Res         | 2013 | 1          | SYT6   | 6.35E-01                    | 9.56E-01                                 |
| Guo Q        | J Natl Cancer Inst | 2015 | 11         | PKNOX2 | 9.00E-01                    | 4.09E-01                                 |
| Shu XO       | Cancer Res         | 2012 | 14         | RAD51B | 1.31E-01                    | 7.97E-01                                 |
| Khan S       | Clin Cancer Res    | 2015 | 19         | ZNF613 | 5.14E-01                    | 7.42E-01                                 |



Table 10: Association with Mortality of Genes Previously Associated with Breast Cancer Phenotypes

| first author    | journal                             | year | chromo-<br>some | gene         | p-value in<br>primary<br>analysis | p-value in<br>primary<br>analysis of<br>ER+ cases |
|-----------------|-------------------------------------|------|-----------------|--------------|-----------------------------------|---------------------------------------------------|
| Michailidou K   | Nat Genet                           | 2013 | 1               | DCLRE1B      | 5.15E-01                          | 1.98E-01                                          |
| Michailidou K   | Nat Genet                           | 2013 | 1               | EMBP1        | 9.58E-02                          | 3.41E-01                                          |
| Thomas G        | Nat Genet                           | 2009 | 1               | EMBP1        | 9.58E-02                          | 3.41E-01                                          |
| Barnett GC      | Radiother Oncol                     | 2014 | 1               | KCND3        | 7.60E-01                          | 4.54E-01                                          |
| Garcia-Closas M | Nat Genet                           | 2013 | 1               | LGR6         | 8.10E-01                          | 4.44E-01                                          |
| Garcia-Closas M | Nat Genet                           | 2013 | 1               | MDM4         | 4.10E-01                          | 4.28E-01                                          |
| Michailidou K   | Nat Genet                           | 2013 | 1               | PEX14        | 9.89E-01                          | 8.36E-02                                          |
| Garcia-Closas M | Nat Genet                           | 2013 | 1               | PEX14        | 9.89E-01                          | 8.36E-02                                          |
| Cai Q           | Nat Genet                           | 2014 | 1               | ZC3H11A      | 4.36E-01                          | 5.42E-01                                          |
| Michailidou K   | Nat Genet                           | 2013 | 2               | DIRC3        | 5.64E-01                          | 6.29E-01                                          |
| Michailidou K   | Nat Genet                           | 2013 | 2               | DLX2         | 6.87E-01                          |                                                   |
| Kim HC          | Breast Cancer Res                   | 2012 | 2               | ERBB4        | 6.80E-01                          | 6.66E-01                                          |
| Michailidou K   | Nat Genet                           | 2013 | 3               | ITPR1        | 8.65E-02                          | 1.64E-02                                          |
| Ahsan H         | Cancer Epidemiol<br>Biomarkers Prev | 2014 | 3               | NEK10        | 4.01E-01                          | 4.09E-01                                          |
| Fletcher O      | J Natl Cancer Inst                  | 2011 | 3               | SLC4A7       | 2.61E-01                          | 3.11E-01                                          |
| Michailidou K   | Nat Genet                           | 2013 | 3               | SLC4A7       | 2.61E-01                          | 3.11E-01                                          |
| Michailidou K   | Nat Genet                           | 2013 | 3               | TGFBR2       | 1.14E-01                          | 1.34E-02                                          |
| Michailidou K   | Nat Genet                           | 2013 | 4               | ADAM29       | 3.64E-01                          | 3.66E-01                                          |
| Michailidou K   | Nat Genet                           | 2013 | 4               | TET2         | 1.79E-01                          | 2.00E-01                                          |
| Michailidou K   | Nat Genet                           | 2013 | 5               | EBF1         | 7.40E-01                          | 7.23E-01                                          |
| Ahsan H         | Cancer Epidemiol<br>Biomarkers Prev | 2014 | 5               | MAP3K1       | 6.88E-01                          | 1.45E-01                                          |
| Michailidou K   | Nat Genet                           | 2013 | 5               | PDE4D        | 4.52E-01                          | 9.09E-01                                          |
| Lindstrom S     | Nat Commun                          | 2014 | 5               | PRDM6        | 2.37E-01                          | 6.41E-01                                          |
| Haiman CA       | Nat Genet                           | 2011 | 5               | TERT         | 9.20E-01                          | 3.86E-01                                          |
| Garcia-Closas M | Nat Genet                           | 2013 | 5               | TERT         | 9.20E-01                          | 3.86E-01                                          |
| Michailidou K   | Nat Genet                           | 2013 | 5               | TERT         | 9.20E-01                          | 3.86E-01                                          |
| Michailidou K   | Nat Genet                           | 2013 | 6               | CCDC170      | 6.65E-01                          | 6.81E-01                                          |
| Gold B          | Proc Natl Acad Sci U S A            | 2008 | 6               | RNF146       | 1.29E-01                          | 9.77E-01                                          |
| Long J          | PLoS Genet                          | 2012 | 6               | TAB2         | 4.39E-01                          | 3.85E-01                                          |
| Fletcher O      | J Natl Cancer Inst                  | 2011 | 8               | CASC8        | 5.03E-01                          | 6.51E-01                                          |
| Easton DF       | Nature                              | 2007 | 8               | CASC8        | 5.03E-01                          | 6.51E-01                                          |
| Ahsan H         | Cancer Epidemiol<br>Biomarkers Prev | 2014 | 8               | CASC8        | 5.03E-01                          | 6.51E-01                                          |
| Michailidou K   | Nat Genet                           | 2013 | 8               | CASC8        | 5.03E-01                          | 6.51E-01                                          |
| Liu M           | Mol Endocrinol                      | 2013 | 8               | LOC101927066 | 9.65E-02                          | 2.04E-02                                          |
| Turnbull C      | Nat Genet                           | 2010 | 9               | CDKN2B-AS1   | 1.88E-01                          | 9.36E-01                                          |
| Kiyotani K      | Hum Mol Genet                       | 2011 | 10              | C10orf11     | 8.15E-01                          | 2.67E-01                                          |
| Ahsan H         | Cancer Epidemiol<br>Biomarkers Prev | 2014 | 10              | FGFR2        | 2.09E-01                          | 3.44E-01                                          |
| Low SK          | PLoS One                            | 2013 | 10              | FGFR2        | 2.09E-01                          | 3.44E-01                                          |
| Fletcher O      | J Natl Cancer Inst                  | 2011 | 10              | FGFR2        | 2.09E-01                          | 3.44E-01                                          |
| Easton DF       | Nature                              | 2007 | 10              | FGFR2        | 2.09E-01                          | 3.44E-01                                          |
| Turnbull C      | Nat Genet                           | 2010 | 10              | FGFR2        | 2.09E-01                          | 3.44E-01                                          |
| Michailidou K   | Nat Genet                           | 2013 | 10              | FGFR2        | 2.09E-01                          | 3.44E-01                                          |
| Thomas G        | Nat Genet                           | 2009 | 10              | FGFR2        | 2.09E-01                          | 3.44E-01                                          |
| Gaudet MM       | PLoS Genet                          | 2010 | 10              | FGFR2        | 2.09E-01                          | 3.44E-01                                          |
| Li J            | Breast Cancer Res Treat             | 2010 | 10              | FGFR2        | 2.09E-01                          | 3.44E-01                                          |
| Hunter DJ       | Nat Genet                           | 2007 | 10              | FGFR2        | 2.09E-01                          | 3.44E-01                                          |

Table 11: Association with Mortality of Genes Previously Associated with Breast Cancer Phenotypes (Continued)

| first author    | journal                             | year | chromo-<br>some | gene     | p-value in<br>primary<br>analysis | p-value in<br>primary<br>analysis of<br>ER+ cases |
|-----------------|-------------------------------------|------|-----------------|----------|-----------------------------------|---------------------------------------------------|
| Li J            | Breast Cancer Res Treat             | 2010 | 10              | FGFR2    | 2.09E-01                          | 3.44E-01                                          |
| Hunter DJ       | Nat Genet                           | 2007 | 10              | FGFR2    | 2.09E-01                          | 3.44E-01                                          |
| Michailidou K   | Nat Genet                           | 2013 | 10              | MLLT10   | 7.15E-01                          | 5.22E-01                                          |
| Michailidou K   | Nat Genet                           | 2013 | 10              | TCF7L2   | 6.15E-01                          | 8.82E-01                                          |
| Michailidou K   | Nat Genet                           | 2013 | 10              | ZMIZ1    | 3.53E-01                          | 2.17E-01                                          |
| Turnbull C      | Nat Genet                           | 2010 | 10              | ZMIZ1    | 3.53E-01                          | 2.17E-01                                          |
| Michailidou K   | Nat Genet                           | 2013 | 10              | ZNF365   | 8.88E-01                          | 6.15E-01                                          |
| Eriksson N      | BMC Med Genet                       | 2012 | 10              | ZNF365   | 8.88E-01                          | 6.15E-01                                          |
| Cai Q           | Hum Mol Genet                       | 2011 | 10              | ZNF365   | 8.88E-01                          | 6.15E-01                                          |
| Lindstrom S     | Nat Commun                          | 2014 | 10              | ZNF365   | 8.88E-01                          | 6.15E-01                                          |
| Turnbull C      | Nat Genet                           | 2010 | 10              | ZNF365   | 8.88E-01                          | 6.15E-01                                          |
| Lindstrom S     | Nat Genet                           | 2011 | 10              | ZNF365   | 8.88E-01                          | 6.15E-01                                          |
| Easton DF       | Nature                              | 2007 | 11              | LSP1     | 3.12E-01                          | 5.98E-01                                          |
| Lindstrom S     | Nat Commun                          | 2014 | 11              | LSP1     | 3.12E-01                          | 5.98E-01                                          |
| Michailidou K   | Nat Genet                           | 2013 | 11              | LSP1     | 3.12E-01                          | 5.98E-01                                          |
| Guo Q           | J Natl Cancer Inst                  | 2015 | 11              | PKNOX2   | 9.00E-01                          | 4.09E-01                                          |
| Michailidou K   | Nat Genet                           | 2013 | 14              | CCDC88C  | 2.16E-01                          | 9.51E-01                                          |
| Michailidou K   | Nat Genet                           | 2013 | 14              | PAX9     | 5.83E-01                          | 4.97E-01                                          |
| Michailidou K   | Nat Genet                           | 2013 | 14              | RAD51B   | 1.31E-01                          | 7.97E-01                                          |
| Orr N           | Nat Genet                           | 2012 | 14              | RAD51B   | 1.31E-01                          | 7.97E-01                                          |
| Cai Q           | Nat Genet                           | 2014 | 15              | PRC1-AS1 | 8.10E-01                          | 8.69E-01                                          |
| Michailidou K   | Nat Genet                           | 2013 | 16              | CASC16   | 7.88E-01                          | 5.78E-01                                          |
| Turnbull C      | Nat Genet                           | 2010 | 16              | CASC16   | 7.88E-01                          | 5.78E-01                                          |
| Thomas G        | Nat Genet                           | 2009 | 16              | CASC16   | 7.88E-01                          | 5.78E-01                                          |
| Fejerman L      | Nat Commun                          | 2014 | 16              | CASC16   | 7.88E-01                          | 5.78E-01                                          |
| Stacey SN       | Nat Genet                           | 2007 | 16              | CASC16   | 7.88E-01                          | 5.78E-01                                          |
| Low SK          | PLoS One                            | 2013 | 16              | CASC16   | 7.88E-01                          | 5.78E-01                                          |
| Garcia-Closas M | Nat Genet                           | 2013 | 16              | CASC16   | 7.88E-01                          | 5.78E-01                                          |
| Long J          | PLoS Genet                          | 2010 | 16              | CASC16   | 7.88E-01                          | 5.78E-01                                          |
| Easton DF       | Nature                              | 2007 | 16              | CASC16   | 7.88E-01                          | 5.78E-01                                          |
| Orr N           | Nat Genet                           | 2012 | 16              | CASC16   | 7.88E-01                          | 5.78E-01                                          |
| Fletcher O      | J Natl Cancer Inst                  | 2011 | 16              | CASC16   | 7.88E-01                          | 5.78E-01                                          |
| Michailidou K   | Nat Genet                           | 2013 | 16              | CDYL2    | 9.40E-01                          | 5.34E-02                                          |
| Garcia-Closas M | Nat Genet                           | 2013 | 16              | FTO      | 6.31E-02                          | 4.26E-02                                          |
| Michailidou K   | Nat Genet                           | 2013 | 16              | FTO      | 6.31E-02                          | 4.26E-02                                          |
| Ahsan H         | Cancer Epidemiol<br>Biomarkers Prev | 2014 | 16              | TOX3     | 8.30E-01                          | 3.39E-01                                          |
| Michailidou K   | Nat Genet                           | 2013 | 17              | STXBP4   | 8.08E-01                          | 9.49E-04                                          |
| Michailidou K   | Nat Genet                           | 2013 | 18              | CHST9    | 5.25E-01                          | 6.86E-01                                          |
| Purrington KS   | Carcinogenesis                      | 2013 | 19              | ANKLE1   | 8.06E-01                          | 1.43E-01                                          |
| Siddiq A        | Hum Mol Genet                       | 2012 | 19              | ANKLE1   | 8.06E-01                          | 1.43E-01                                          |
| Antoniou AC     | Nat Genet                           | 2010 | 19              | BABAM1   | 7.62E-01                          | 2.55E-01                                          |
| Garcia-Closas M | Nat Genet                           | 2013 | 19              | BABAM1   | 7.62E-01                          | 2.55E-01                                          |
| Couch FJ        | PLoS Genet                          | 2013 | 19              | BABAM1   | 7.62E-01                          | 2.55E-01                                          |
| Michailidou K   | Nat Genet                           | 2013 | 19              | ELL      | 3.94E-02                          | 8.10E-02                                          |
| Siddiq A        | Hum Mol Genet                       | 2012 | 20              | RALY     | 2.71E-01                          | 5.48E-01                                          |
| Michailidou K   | Nat Genet                           | 2013 | 22              | EMID1    | 4.55E-01                          | 2.23E-01                                          |
| Michailidou K   | Nat Genet                           | 2013 | 22              | MKL1     | 1.31E-01                          | 3.16E-01                                          |
| Lindstrom S     | Nat Commun                          | 2014 | 22              | SGSM3    | 6.17E-01                          | 2.63E-01                                          |
| Lindstrom S     | Nat Commun                          | 2014 | 22              | TMEM184B | 6.21E-01                          | 8.11E-01                                          |

Table 12: Most Significant Genes Identified by Logistic Regression with ER+ Tumor

| Gene     | Exome Chip         |                  |          | TCGA               |                  |          |
|----------|--------------------|------------------|----------|--------------------|------------------|----------|
|          | Minor Allele Count | Variants in Gene | p-value  | Minor Allele Count | Variants in Gene | p-value  |
| ARHGAP29 | 23                 | 9                | 9.47e-04 | 21631              | 216              | 2.25e-01 |
| ARL10    | 14                 | 2                | 2.94e-04 | 5050               | 33               | 1.66e-01 |
| C12orf60 | 1666               | 5                | 4.53e-04 | 12083              | 80               | 2.37e-01 |
| C9orf47  | 1661               | 7                | 7.96e-04 | 4675               | 33               | 5.66e-01 |
| IL1RAP   | 976                | 5                | 9.24e-04 | 95561              | 761              | 1.42e-01 |
| KATNA1   | 10                 | 4                | 5.88e-04 | 42989              | 200              | 5.19e-01 |
| KCNJ8    | 9                  | 2                | 1.00e-03 | 397                | 14               | 5.37e-01 |
| KLF10    | 13                 | 4                | 7.49e-04 | 3667               | 38               | 1.00e+00 |
| LRRK1    | 2511               | 23               | 1.08e-03 | 141047             | 954              | 8.03e-01 |
| LY6G5B   | 1936               | 5                | 6.06e-04 | 1607               | 25               | 2.97e-01 |
| MEIS3    | 17                 | 4                | 1.40e-05 | 4214               | 36               | 7.19e-03 |
| P3H3     | 2884               | 15               | 2.37e-04 | 12076              | 61               | 1.07e-01 |
| POU5F1   | 5215               | 6                | 1.05e-03 | 17916              | 95               | 6.13e-01 |
| PRDM5    | 2531               | 5                | 2.56e-04 | 205478             | 1257             | 8.89e-01 |
| QRSL1    | 507                | 6                | 3.74e-04 | 37784              | 242              | 5.62e-02 |
| SLC25A39 | 1676               | 2                | 3.99e-04 | 4748               | 30               | 1.00e+00 |
| SLC38A4  | 210                | 3                | 8.98e-04 | 39639              | 356              | 5.01e-01 |
| TMEM209  | 33                 | 6                | 8.42e-04 | 24913              | 171              | 2.75e-01 |
| TSPYL1   | 583                | 4                | 9.25e-06 | 4728               | 33               | 5.29e-01 |

Table 13: Most Significant Genes Identified by Logistic Regression with PR+ Tumor

| Gene     | Exome Chip         |                  |          | TCGA               |                  |          |
|----------|--------------------|------------------|----------|--------------------|------------------|----------|
|          | Minor Allele Count | Variants in Gene | p-value  | Minor Allele Count | Variants in Gene | p-value  |
| AIM1     | 2169               | 16               | 3.34e-05 | 67054              | 411              | 1.00e+00 |
| BCL9L    | 68                 | 8                | 2.44e-04 | 2868               | 41               | 6.70e-01 |
| C12orf42 | 1835               | 5                | 6.50e-04 | 111518             | 989              | 8.73e-01 |
| CD68     | 913                | 5                | 8.33e-06 | 2203               | 15               | 8.79e-01 |
| IL1RAP   | 964                | 5                | 9.08e-04 | 95092              | 761              | 7.60e-01 |
| LIF      | 43                 | 2                | 9.03e-04 | 4224               | 30               | 3.82e-01 |
| MON1B    | 72                 | 4                | 5.30e-04 | 15354              | 80               | 4.41e-01 |
| MPDU1    | 572                | 4                | 1.65e-05 | 1635               | 14               | 1.00e+00 |
| MYH6     | 1643               | 13               | 7.55e-04 | 13928              | 135              | 4.45e-01 |
| NPM1     | 1554               | 1                | 9.19e-04 | 22640              | 86               | 4.36e-01 |
| PCDHA4   | 1750               | 6                | 7.66e-04 | 4486               | 22               | 3.49e-02 |
| PDIA4    | 118                | 13               | 4.99e-04 | 14658              | 139              | 6.83e-01 |
| QRSL1    | 500                | 6                | 7.17e-06 | 37658              | 242              | 3.68e-01 |
| RNF214   | 1259               | 2                | 5.71e-04 | 38468              | 274              | 3.76e-01 |
| SHBG     | 403                | 4                | 4.25e-04 | 9594               | 68               | 8.89e-01 |
| SLC4A7   | 2604               | 9                | 8.35e-04 | 81498              | 538              | 3.72e-01 |
| TDRD5    | 2514               | 8                | 9.34e-04 | 88788              | 487              | 1.65e-01 |
| TGFBI    | 46                 | 16               | 2.13e-04 | 32096              | 183              | 6.85e-01 |
| UBN1     | 141                | 11               | 7.77e-04 | 32105              | 185              | 1.68e-02 |
| UTP23    | 540                | 2                | 2.20e-04 | 3557               | 43               | 2.69e-01 |

Table 14: Most Significant Genes Identified by Logistic Regression with HER2+ Tumor

| Gene    | Exome Chip         |                  |          | TCGA               |                  |          |
|---------|--------------------|------------------|----------|--------------------|------------------|----------|
|         | Minor Allele Count | Variants in Gene | p-value  | Minor Allele Count | Variants in Gene | p-value  |
| ANGPT2  | 14                 | 3                | 1.50e-03 | 80784              | 593              | 9.01e-01 |
| CERS4   | 720                | 6                | 1.89e-04 | 32624              | 202              | 1.22e-01 |
| CPM     | 23                 | 2                | 3.06e-04 | 54047              | 636              | 6.27e-01 |
| CROCC   | 199                | 13               | 1.01e-03 | 15275              | 152              | 1.42e-01 |
| CTSL    | 8                  | 2                | 7.12e-04 | 2255               | 31               | 8.91e-01 |
| DACT2   | 515                | 6                | 5.63e-04 | 22474              | 203              | 4.29e-01 |
| FAM171B | 10                 | 3                | 1.47e-03 | 23841              | 190              | 3.39e-01 |
| GALNT16 | 1100               | 4                | 9.30e-04 | 64711              | 501              | 4.73e-01 |
| GPT     | 661                | 9                | 1.50e-03 | 2003               | 8                | 6.99e-01 |
| HEATR6  | 98                 | 8                | 6.17e-04 | 2894               | 69               | 5.23e-01 |
| MCM7    | 385                | 8                | 4.03e-04 | 3023               | 28               | 6.73e-01 |
| METAP1D | 556                | 6                | 1.27e-03 | 41095              | 442              | 1.25e-01 |
| PCYOX1  | 245                | 2                | 1.01e-03 | 6244               | 88               | 4.32e-01 |
| PIAS3   | 29                 | 5                | 4.16e-04 | 34                 | 1                | 9.17e-01 |
| PIGP    | 226                | 3                | 4.14e-04 | 6035               | 49               | 8.13e-01 |
| RECQL4  | 594                | 13               | 1.74e-04 | 4361               | 16               | 5.90e-01 |
| RWDD4   | 291                | 1                | 7.73e-04 | 23355              | 141              | 2.62e-01 |
| TFAP2B  | 495                | 4                | 9.89e-04 | 11301              | 131              | 7.63e-01 |
| VWC2    | 757                | 5                | 5.61e-04 | 57463              | 576              | 1.00e+00 |
| ZNF620  | 59                 | 4                | 8.75e-04 | 3274               | 27               | 5.39e-01 |

Table 15: Most Significant Genes Identified by Logistic Regression with High Tumor Grade

| Gene        | Minor Allele Count | Variants in Gene | p-value  |
|-------------|--------------------|------------------|----------|
| C8orf37-AS1 | 1057               | 2                | 5.47e-04 |
| CNTNAP3     | 628                | 1                | 1.09e-04 |
| COL27A1     | 7713               | 26               | 1.48e-04 |
| CTDP1       | 604                | 5                | 1.21e-03 |
| GUCY2C      | 26                 | 5                | 5.01e-04 |
| HOXC4       | 1596               | 3                | 2.52e-04 |
| NPLOC4      | 1863               | 4                | 7.00e-04 |
| NSUN2       | 686                | 5                | 2.36e-04 |
| PNLIPRP3    | 306                | 8                | 5.98e-04 |
| PNPLA7      | 329                | 14               | 1.05e-03 |
| RBM27       | 15                 | 3                | 7.47e-04 |
| SCG2        | 84                 | 4                | 2.06e-05 |
| SH2D4A      | 837                | 7                | 2.21e-05 |
| SSC4D       | 2202               | 6                | 7.28e-04 |
| STRA6       | 2276               | 10               | 1.65e-04 |
| TAF1C       | 1623               | 15               | 6.48e-04 |
| TCTE1       | 1314               | 11               | 9.92e-04 |
| TMEM132A    | 886                | 9                | 1.17e-03 |
| TMEM88B     | 172                | 2                | 4.66e-04 |
| ZBTB43      | 14                 | 4                | 9.55e-04 |

Tumor grade was not available for the TCGA participants

Table 16: Most Significant Genes Identified by Logistic Regression with High Tumor Stage

| Gene        | Exome Chip         |                  |          | TCGA               |                  |          |
|-------------|--------------------|------------------|----------|--------------------|------------------|----------|
|             | Minor Allele Count | Variants in Gene | p-value  | Minor Allele Count | Variants in Gene | p-value  |
| C8orf37-AS1 | 1057               | 2                | 5.47e-04 | 525417             | 3137             | 5.96e-01 |
| CNTNAP3     | 628                | 1                | 1.09e-04 | 42217              | 161              | 8.01e-01 |
| COL27A1     | 7713               | 26               | 1.48e-04 | 165929             | 986              | 1.46e-01 |
| CTDP1       | 604                | 5                | 1.21e-03 | 92110              | 465              | 1.00e+00 |
| GUCY2C      | 26                 | 5                | 5.01e-04 | 14059              | 333              | 5.68e-01 |
| HOXC4       | 1596               | 3                | 2.52e-04 | 14994              | 116              | 2.28e-01 |
| NPLOC4      | 1863               | 4                | 7.00e-04 | 96837              | 387              | 3.65e-01 |
| NSUN2       | 686                | 5                | 2.36e-04 | 48493              | 236              | 2.07e-01 |
| PNLIPRP3    | 306                | 8                | 5.98e-04 | 11371              | 200              | 6.80e-01 |
| PNPLA7      | 329                | 14               | 1.05e-03 | 20244              | 89               | 1.00e+00 |
| RBM27       | 15                 | 3                | 7.47e-04 | 33619              | 222              | 6.18e-01 |
| SCG2        | 84                 | 4                | 2.06e-05 | 346                | 23               | 4.21e-01 |
| SH2D4A      | 837                | 7                | 2.21e-05 | 47631              | 522              | 4.89e-01 |
| SSC4D       | 2202               | 6                | 7.28e-04 | 27812              | 136              | 3.39e-01 |
| STRA6       | 2276               | 10               | 1.65e-04 | 20707              | 136              | 2.85e-01 |
| TAF1C       | 1623               | 15               | 6.48e-04 | 15310              | 98               | 4.25e-01 |
| TCTE1       | 1314               | 11               | 9.92e-04 | 10972              | 116              | 3.86e-01 |
| TMEM132A    | 886                | 9                | 1.17e-03 | 16624              | 65               | 1.31e-01 |
| TMEM88B     | 172                | 2                | 4.66e-04 | 1058               | 11               | 7.67e-01 |
| ZBTB43      | 14                 | 4                | 9.55e-04 | 6467               | 111              | 6.02e-02 |

Table 17: Association with Tumor Characteristics of Genes Previously Associated with Breast Cancer Phenotypes

| first author    | journal                  | year | chromosome | gene         | p-value in ER analysis | p-value in PR analysis | p-value in HER2 analysis | p-value in high grade analysis | p-value in high stage analysis |
|-----------------|--------------------------|------|------------|--------------|------------------------|------------------------|--------------------------|--------------------------------|--------------------------------|
| Michailidou K   | Nat Genet                | 2013 | 1          | DCLRE1B      | 5.97E-01               | 8.44E-01               | 1.01E-01                 | 3.88E-01                       | 4.97E-01                       |
| Michailidou K   | Nat Genet                | 2013 | 1          | EMBP1        | 7.61E-01               | 9.15E-01               | 3.36E-01                 | 6.49E-01                       | 5.85E-01                       |
| Thomas G        | Nat Genet                | 2009 | 1          | EMBP1        | 7.61E-01               | 9.15E-01               | 3.36E-01                 | 6.49E-01                       | 5.85E-01                       |
| Barnett GC      | Radiother Oncol          | 2014 | 1          | KCND3        | 9.61E-02               | 6.94E-01               | 5.81E-01                 | 2.31E-01                       | 4.48E-01                       |
| Garcia-Closas M | Nat Genet                | 2013 | 1          | LGR6         | 1.00E+00               | 6.72E-01               | 3.17E-02                 | 1.35E-01                       | 5.95E-01                       |
| Garcia-Closas M | Nat Genet                | 2013 | 1          | MDM4         | 9.24E-01               | 8.34E-01               | 9.06E-01                 | 2.17E-01                       | 3.10E-01                       |
| Michailidou K   | Nat Genet                | 2013 | 1          | PEX14        | 1.00E+00               | 8.33E-01               | 4.70E-01                 | 2.94E-01                       | 6.39E-01                       |
| Garcia-Closas M | Nat Genet                | 2013 | 1          | PEX14        | 1.00E+00               | 8.33E-01               | 4.70E-01                 | 2.94E-01                       | 6.39E-01                       |
| Cai Q           | Nat Genet                | 2014 | 1          | ZC3H11A      | 3.42E-01               | 6.15E-01               | 2.30E-01                 | 3.78E-01                       | 2.41E-01                       |
| Michailidou K   | Nat Genet                | 2013 | 2          | DIRC3        | 1.88E-01               | 1.00E+00               | 5.14E-01                 | 1.00E+00                       | 1.00E+00                       |
| Michailidou K   | Nat Genet                | 2013 | 2          | DLX2         | 7.36E-01               | 7.42E-01               | 1.00E+00                 | 5.79E-01                       | 8.61E-01                       |
| Kim HC          | Breast Cancer Res        | 2012 | 2          | ERBB4        | 1.86E-02               | 1.98E-02               | 3.91E-01                 | 1.00E+00                       | 5.71E-01                       |
| Michailidou K   | Nat Genet                | 2013 | 3          | ITPR1        | 7.43E-01               | 2.42E-01               | 3.15E-01                 | 6.48E-01                       | 8.65E-01                       |
| Ahsan H         | Cancer Epi Bio Prev      | 2014 | 3          | NEK10        | 1.22E-02               | 6.19E-03               | 7.79E-01                 | 7.59E-03                       | 5.61E-01                       |
| Michailidou K   | Nat Genet                | 2013 | 3          | SLC4A7       | 4.84E-03               | 8.35E-04               | 5.56E-01                 | 1.23E-01                       | 8.12E-01                       |
| Fletcher O      | J Natl Cancer Inst       | 2011 | 3          | SLC4A7       | 4.84E-03               | 8.35E-04               | 5.56E-01                 | 1.23E-01                       | 8.12E-01                       |
| Michailidou K   | Nat Genet                | 2013 | 3          | TGFBR2       | 3.52E-01               | 3.45E-01               | 8.78E-01                 | 7.13E-01                       | 4.49E-01                       |
| Michailidou K   | Nat Genet                | 2013 | 4          | ADAM29       | 7.51E-01               | 6.78E-01               | 1.00E+00                 | 1.00E+00                       | 3.66E-01                       |
| Michailidou K   | Nat Genet                | 2013 | 4          | TET2         | 1.09E-01               | 2.37E-01               | 9.37E-02                 | 5.52E-01                       | 6.11E-01                       |
| Michailidou K   | Nat Genet                | 2013 | 5          | EBF1         | 5.47E-01               | 2.81E-01               | 1.00E+00                 | 1.00E+00                       | 3.95E-01                       |
| Ahsan H         | Cancer Epi Bio Prev      | 2014 | 5          | MAP3K1       | 6.60E-01               | 6.16E-01               | 7.21E-01                 | 6.86E-01                       | 1.65E-03                       |
| Michailidou K   | Nat Genet                | 2013 | 5          | PDE4D        | 5.95E-02               | 2.93E-01               | 5.48E-01                 | 5.55E-02                       | 9.01E-01                       |
| Lindstrom S     | Nat Commun               | 2014 | 5          | PRDM6        | 8.60E-01               | 8.28E-01               | 5.87E-01                 | 7.00E-01                       | 3.93E-01                       |
| Garcia-Closas M | Nat Genet                | 2013 | 5          | TERT         | 1.75E-02               | 4.97E-02               | 1.00E+00                 | 7.74E-01                       | 4.62E-01                       |
| Michailidou K   | Nat Genet                | 2013 | 5          | TERT         | 1.75E-02               | 4.97E-02               | 1.00E+00                 | 7.74E-01                       | 4.62E-01                       |
| Haiman CA       | Nat Genet                | 2011 | 5          | TERT         | 1.75E-02               | 4.97E-02               | 1.00E+00                 | 7.74E-01                       | 4.62E-01                       |
| Michailidou K   | Nat Genet                | 2013 | 6          | CCDC170      | 1.59E-01               | 3.26E-02               | 2.08E-01                 | 5.05E-01                       | 2.74E-01                       |
| Gold B          | Proc Natl Acad Sci U S A | 2008 | 6          | RNF146       | 1.80E-01               | 1.11E-01               | 9.48E-01                 | 5.22E-01                       | 6.51E-01                       |
| Long J          | PLoS Genet               | 2012 | 6          | TAB2         | 5.77E-01               | 7.20E-01               | 7.86E-01                 | 6.08E-01                       | 5.05E-02                       |
| Easton DF       | Nature                   | 2007 | 8          | CASC8        | 1.05E-01               | 2.47E-01               | 1.00E+00                 | 2.14E-01                       | 6.42E-01                       |
| Michailidou K   | Nat Genet                | 2013 | 8          | CASC8        | 1.05E-01               | 2.47E-01               | 1.00E+00                 | 2.14E-01                       | 6.42E-01                       |
| Ahsan H         | Cancer Epi Bio Prev      | 2014 | 8          | CASC8        | 1.05E-01               | 2.47E-01               | 1.00E+00                 | 2.14E-01                       | 6.42E-01                       |
| Fletcher O      | J Natl Cancer Inst       | 2011 | 8          | CASC8        | 1.05E-01               | 2.47E-01               | 1.00E+00                 | 2.14E-01                       | 6.42E-01                       |
| Liu M           | Mol Endocrinol           | 2013 | 8          | LOC101927066 | 2.17E-01               | 1.37E-01               | 6.10E-02                 | 1.39E-01                       | 8.07E-01                       |
| Turnbull C      | Nat Genet                | 2010 | 9          | CDKN2B-AS1   | 6.02E-01               | 7.27E-02               | 1.00E+00                 | 3.00E-01                       | 3.75E-01                       |
| Kiyotani K      | Hum Mol Genet            | 2011 | 10         | C10orf11     | 7.48E-01               | 4.40E-01               | 3.62E-01                 | 3.25E-01                       | 4.20E-02                       |
| Low SK          | PLoS One                 | 2013 | 10         | FGFR2        | 1.95E-01               | 1.51E-01               | 4.69E-01                 | 5.03E-02                       | 4.98E-01                       |
| Fletcher O      | J Natl Cancer Inst       | 2011 | 10         | FGFR2        | 1.95E-01               | 1.51E-01               | 4.69E-01                 | 5.03E-02                       | 4.98E-01                       |
| Michailidou K   | Nat Genet                | 2013 | 10         | FGFR2        | 1.95E-01               | 1.51E-01               | 4.69E-01                 | 5.03E-02                       | 4.98E-01                       |
| Hunter DJ       | Nat Genet                | 2007 | 10         | FGFR2        | 1.95E-01               | 1.51E-01               | 4.69E-01                 | 5.03E-02                       | 4.98E-01                       |
| Thomas G        | Nat Genet                | 2009 | 10         | FGFR2        | 1.95E-01               | 1.51E-01               | 4.69E-01                 | 5.03E-02                       | 4.98E-01                       |
| Easton DF       | Nature                   | 2007 | 10         | FGFR2        | 1.95E-01               | 1.51E-01               | 4.69E-01                 | 5.03E-02                       | 4.98E-01                       |
| Li J            | Breast Cancer Res Treat  | 2010 | 10         | FGFR2        | 1.95E-01               | 1.51E-01               | 4.69E-01                 | 5.03E-02                       | 4.98E-01                       |
| Ahsan H         | Cancer Epi Bio Prev      | 2014 | 10         | FGFR2        | 1.95E-01               | 1.51E-01               | 4.69E-01                 | 5.03E-02                       | 4.98E-01                       |
| Gaudet MM       | PLoS Genet               | 2010 | 10         | FGFR2        | 1.95E-01               | 1.51E-01               | 4.69E-01                 | 5.03E-02                       | 4.98E-01                       |

Table 18: Association with Tumor Characteristics of Genes Previously Associated with Breast Cancer Phenotypes (Continued)

| first author    | journal                  | year | chromosome | gene         | p-value in ER analysis | p-value in PR analysis | p-value in HER2 analysis | p-value in high grade analysis | p-value in high stage analysis |
|-----------------|--------------------------|------|------------|--------------|------------------------|------------------------|--------------------------|--------------------------------|--------------------------------|
| Michailidou K   | Nat Genet                | 2013 | 1          | DCLRE1B      | 5.97E-01               | 8.44E-01               | 1.01E-01                 | 3.88E-01                       | 4.97E-01                       |
| Michailidou K   | Nat Genet                | 2013 | 1          | EMBP1        | 7.61E-01               | 9.15E-01               | 3.36E-01                 | 6.49E-01                       | 5.85E-01                       |
| Thomas G        | Nat Genet                | 2009 | 1          | EMBP1        | 7.61E-01               | 9.15E-01               | 3.36E-01                 | 6.49E-01                       | 5.85E-01                       |
| Barnett GC      | Radiother Oncol          | 2014 | 1          | KCND3        | 9.61E-02               | 6.94E-01               | 5.81E-01                 | 2.31E-01                       | 4.48E-01                       |
| Garcia-Closas M | Nat Genet                | 2013 | 1          | LGR6         | 1.00E+00               | 6.72E-01               | 3.17E-02                 | 1.35E-01                       | 5.95E-01                       |
| Garcia-Closas M | Nat Genet                | 2013 | 1          | MDM4         | 9.24E-01               | 8.34E-01               | 9.06E-01                 | 2.17E-01                       | 3.10E-01                       |
| Michailidou K   | Nat Genet                | 2013 | 1          | PEX14        | 1.00E+00               | 8.33E-01               | 4.70E-01                 | 2.94E-01                       | 6.39E-01                       |
| Garcia-Closas M | Nat Genet                | 2013 | 1          | PEX14        | 1.00E+00               | 8.33E-01               | 4.70E-01                 | 2.94E-01                       | 6.39E-01                       |
| Cai Q           | Nat Genet                | 2014 | 1          | ZC3H11A      | 3.42E-01               | 6.15E-01               | 2.30E-01                 | 3.78E-01                       | 2.41E-01                       |
| Michailidou K   | Nat Genet                | 2013 | 2          | DIRC3        | 1.88E-01               | 1.00E+00               | 5.14E-01                 | 1.00E+00                       | 1.00E+00                       |
| Michailidou K   | Nat Genet                | 2013 | 2          | DLX2         | 7.36E-01               | 7.42E-01               | 1.00E+00                 | 5.79E-01                       | 8.61E-01                       |
| Kim HC          | Breast Cancer Res        | 2012 | 2          | ERBB4        | 1.86E-02               | 1.98E-02               | 3.91E-01                 | 1.00E+00                       | 5.71E-01                       |
| Michailidou K   | Nat Genet                | 2013 | 3          | ITPR1        | 7.43E-01               | 2.42E-01               | 3.15E-01                 | 6.48E-01                       | 8.65E-01                       |
| Ahsan H         | Cancer Epi Bio Prev      | 2014 | 3          | NEK10        | 1.22E-02               | 6.19E-03               | 7.79E-01                 | 7.59E-03                       | 5.61E-01                       |
| Michailidou K   | Nat Genet                | 2013 | 3          | SLC4A7       | 4.84E-03               | 8.35E-04               | 5.56E-01                 | 1.23E-01                       | 8.12E-01                       |
| Fletcher O      | J Natl Cancer Inst       | 2011 | 3          | SLC4A7       | 4.84E-03               | 8.35E-04               | 5.56E-01                 | 1.23E-01                       | 8.12E-01                       |
| Michailidou K   | Nat Genet                | 2013 | 3          | TGFBR2       | 3.52E-01               | 3.45E-01               | 8.78E-01                 | 7.13E-01                       | 4.49E-01                       |
| Michailidou K   | Nat Genet                | 2013 | 4          | ADAM29       | 7.51E-01               | 6.78E-01               | 1.00E+00                 | 1.00E+00                       | 3.66E-01                       |
| Michailidou K   | Nat Genet                | 2013 | 4          | TET2         | 1.09E-01               | 2.37E-01               | 9.37E-02                 | 5.52E-01                       | 6.11E-01                       |
| Michailidou K   | Nat Genet                | 2013 | 5          | EBF1         | 5.47E-01               | 2.81E-01               | 1.00E+00                 | 1.00E+00                       | 3.95E-01                       |
| Ahsan H         | Cancer Epi Bio Prev      | 2014 | 5          | MAP3K1       | 6.60E-01               | 6.16E-01               | 7.21E-01                 | 6.86E-01                       | 1.65E-03                       |
| Michailidou K   | Nat Genet                | 2013 | 5          | PDE4D        | 5.95E-02               | 2.93E-01               | 5.48E-01                 | 5.55E-02                       | 9.01E-01                       |
| Lindstrom S     | Nat Commun               | 2014 | 5          | PRDM6        | 8.60E-01               | 8.28E-01               | 5.87E-01                 | 7.00E-01                       | 3.93E-01                       |
| Garcia-Closas M | Nat Genet                | 2013 | 5          | TERT         | 1.75E-02               | 4.97E-02               | 1.00E+00                 | 7.74E-01                       | 4.62E-01                       |
| Michailidou K   | Nat Genet                | 2013 | 5          | TERT         | 1.75E-02               | 4.97E-02               | 1.00E+00                 | 7.74E-01                       | 4.62E-01                       |
| Haiman CA       | Nat Genet                | 2011 | 5          | TERT         | 1.75E-02               | 4.97E-02               | 1.00E+00                 | 7.74E-01                       | 4.62E-01                       |
| Michailidou K   | Nat Genet                | 2013 | 6          | CCDC170      | 1.59E-01               | 3.26E-02               | 2.08E-01                 | 5.05E-01                       | 2.74E-01                       |
| Gold B          | Proc Natl Acad Sci U S A | 2008 | 6          | RNF146       | 1.80E-01               | 1.11E-01               | 9.48E-01                 | 5.22E-01                       | 6.51E-01                       |
| Long J          | PLoS Genet               | 2012 | 6          | TAB2         | 5.77E-01               | 7.20E-01               | 7.86E-01                 | 6.08E-01                       | 5.05E-02                       |
| Easton DF       | Nature                   | 2007 | 8          | CASC8        | 1.05E-01               | 2.47E-01               | 1.00E+00                 | 2.14E-01                       | 6.42E-01                       |
| Michailidou K   | Nat Genet                | 2013 | 8          | CASC8        | 1.05E-01               | 2.47E-01               | 1.00E+00                 | 2.14E-01                       | 6.42E-01                       |
| Ahsan H         | Cancer Epi Bio Prev      | 2014 | 8          | CASC8        | 1.05E-01               | 2.47E-01               | 1.00E+00                 | 2.14E-01                       | 6.42E-01                       |
| Fletcher O      | J Natl Cancer Inst       | 2011 | 8          | CASC8        | 1.05E-01               | 2.47E-01               | 1.00E+00                 | 2.14E-01                       | 6.42E-01                       |
| Liu M           | Mol Endocrinol           | 2013 | 8          | LOC101927066 | 2.17E-01               | 1.37E-01               | 6.10E-02                 | 1.39E-01                       | 8.07E-01                       |
| Turnbull C      | Nat Genet                | 2010 | 9          | CDKN2B-AS1   | 6.02E-01               | 7.27E-02               | 1.00E+00                 | 3.00E-01                       | 3.75E-01                       |
| Kiyotani K      | Hum Mol Genet            | 2011 | 10         | C10orf11     | 7.48E-01               | 4.40E-01               | 3.62E-01                 | 3.25E-01                       | 4.20E-02                       |
| Low SK          | PLoS One                 | 2013 | 10         | FGFR2        | 1.95E-01               | 1.51E-01               | 4.69E-01                 | 5.03E-02                       | 4.98E-01                       |
| Fletcher O      | J Natl Cancer Inst       | 2011 | 10         | FGFR2        | 1.95E-01               | 1.51E-01               | 4.69E-01                 | 5.03E-02                       | 4.98E-01                       |
| Michailidou K   | Nat Genet                | 2013 | 10         | FGFR2        | 1.95E-01               | 1.51E-01               | 4.69E-01                 | 5.03E-02                       | 4.98E-01                       |
| Hunter DJ       | Nat Genet                | 2007 | 10         | FGFR2        | 1.95E-01               | 1.51E-01               | 4.69E-01                 | 5.03E-02                       | 4.98E-01                       |
| Thomas G        | Nat Genet                | 2009 | 10         | FGFR2        | 1.95E-01               | 1.51E-01               | 4.69E-01                 | 5.03E-02                       | 4.98E-01                       |
| Easton DF       | Nature                   | 2007 | 10         | FGFR2        | 1.95E-01               | 1.51E-01               | 4.69E-01                 | 5.03E-02                       | 4.98E-01                       |
| Li J            | Breast Cancer Res Treat  | 2010 | 10         | FGFR2        | 1.95E-01               | 1.51E-01               | 4.69E-01                 | 5.03E-02                       | 4.98E-01                       |
| Ahsan H         | Cancer Epi Bio Prev      | 2014 | 10         | FGFR2        | 1.95E-01               | 1.51E-01               | 4.69E-01                 | 5.03E-02                       | 4.98E-01                       |
| Gaudet MM       | PLoS Genet               | 2010 | 10         | FGFR2        | 1.95E-01               | 1.51E-01               | 4.69E-01                 | 5.03E-02                       | 4.98E-01                       |
